# Supplementary material for: Nanoparticle-induced structural changes in lung surfactant membranes: an X-ray scattering study
Source: Royal Society of Chemistry journal article supplement (doi:10.1039/c8en00189h), 2018-01-01
Supplement: c8en00189h1.pdf [file c8en00189h1.pdf]

## Electronic Supplementary Information

### Nanoparticle-Induced Structural Changes in Lung Surfactant Membranes: An X-ray Scattering Study

Shirin Behyan,<sup>a,b</sup> Olga Borozenko,<sup>a,b</sup> Abdullah Khan,<sup>a</sup> Manon Faral,<sup>b</sup> Antonella Badia,<sup>\*b,c</sup> and Christine DeWolf<sup>\*a,c</sup>

<sup>a</sup>Department of Chemistry and Biochemistry and Centre for NanoScience Research, Concordia University, 7141 Sherbrooke St. West, Montréal, QC H4B 1R6, Canada. E-mail: christine.dewolf@concordia.ca

<sup>b</sup>Address here. Département de chimie, Université de Montréal, C.P. 6128 succursale Centre-ville, Montréal, QC H3C 3J7, Canada. E-mail: antonella.badia@umontreal.ca

<sup>c</sup>FRQNT Quebec Centre for Advanced Materials.

\*Corresponding Authors Contact Information:

E-mail: christine.dewolf@concordia.ca

E-mail: antonella.badia@umontreal.ca

**Table S1.** Physical Characteristics of the Silica NPs.

| Particle type          | Hydrodynamic diameter (Å) | Zeta potential (mV) |
|------------------------|---------------------------|---------------------|
| Cationic NPs (Levasil) | 240 ± 70                  | +43 ± 1             |
| Anionic NPs (Bindzil)  | 170 ± 50                  | -12 ± 4             |

**Table S2.** The maxima of the fitted Bragg peaks  $Q_{xy}$  and Bragg rods  $Q_z$ , for DPPC, DPPC:DLPC (7:3), DPPC:POPG (7:3), and Infasurf on subphases of water, 0.001 wt% anionic silica NPs, and 0.001 wt% cationic silica NPs at 35 mN/m and 22.0 ± 0.5 °C.

| System    | Subphase     | (10) [Å <sup>-1</sup> ] |        | (01) [Å <sup>-1</sup> ] |       | (1±1) [Å <sup>-1</sup> ] |        |
|-----------|--------------|-------------------------|--------|-------------------------|-------|--------------------------|--------|
|           |              | $Q_{xy}$                | $Q_z$  | $Q_{xy}$                | $Q_z$ | $Q_{xy}$                 | $Q_z$  |
| DPPC      | Water        | 1.367                   | 0.637  | 1.405                   | 0.556 | 1.468                    | 0.0808 |
| DPPC      | Anionic NPs  | 1.324                   | 0.740  | 1.351                   | 0.692 | 1.465                    | 0.0488 |
| DPPC      | Cationic NPs | 1.333                   | 0.709  | 1.365                   | 0.664 | 1.465                    | 0.0450 |
| DPPC:DLPC | Water        | 1.351                   | 0.629  | 1.367                   | 0.606 | 1.465                    | 0.0232 |
| DPPC:DLPC | Anionic NPs  | 1.359                   | 0.623  | 1.407                   | 0.545 | 1.465                    | 0.0776 |
| DPPC:DLPC | Cationic NPs | 1.331                   | 0.599  | 1.356                   | 0.621 | 1.465                    | 0.0218 |
| DPPC:POPG | Water        | 1.408                   | 0.476  | 1.434                   | 0.394 | 1.473                    | 0.0826 |
| DPPC:POPG | Anionic NPs  | 1.394                   | 0.541  | 1.419                   | 0.446 | 1.467                    | 0.0940 |
| DPPC:POPG | Cationic NPs | 1.475                   | 0.0885 | 1.444                   | 0.177 | 1.475                    | 0.0884 |

**Table S3.** The maxima of the fitted Bragg peaks  $Q_{xy}$ , Bragg rods  $Q_z$ , chain tilt (t), and projected area per chain ( $A_{xy}$ ) for POPG on the subphase containing 0.001 wt% cationic silica NPs.

| System/subphase        | (10) [Å <sup>-1</sup> ]     |                          | (01) [Å <sup>-1</sup> ]     |                          | (1±1) [Å <sup>-1</sup> ]    |                          | t [°] | $A_{xy}$ [Å <sup>2</sup> ] |
|------------------------|-----------------------------|--------------------------|-----------------------------|--------------------------|-----------------------------|--------------------------|-------|----------------------------|
|                        | $Q_{xy}$ [Å <sup>-1</sup> ] | $Q_z$ [Å <sup>-1</sup> ] | $Q_{xy}$ [Å <sup>-1</sup> ] | $Q_z$ [Å <sup>-1</sup> ] | $Q_{xy}$ [Å <sup>-1</sup> ] | $Q_z$ [Å <sup>-1</sup> ] |       |                            |
| Pure POPG-cationic NPs | 1.455                       | 0.000                    | 1.455                       | 0.000                    | 1.455                       | 0.000                    | 0.0   | 21.53                      |

**Table S4.** Fitted parameters for the XR data of DLPC and POPG monolayers on subphases of water, 0.001 wt% anionic silica NPs, and 0.001 wt% cationic silica NPs at a surface pressure of 35 mN/m and temperature of  $22.0 \pm 0.5$  °C.

| System | Subphase | Tail             |                                             | Head group       |                                             | Nanoparticle     |                                             | $\sigma$<br>[Å] |
|--------|----------|------------------|---------------------------------------------|------------------|---------------------------------------------|------------------|---------------------------------------------|-----------------|
|        |          | Thickness<br>(Å) | $\rho$<br>(e <sup>-</sup> /Å <sup>3</sup> ) | Thickness<br>(Å) | $\rho$<br>(e <sup>-</sup> /Å <sup>3</sup> ) | Thickness<br>(Å) | $\rho$<br>(e <sup>-</sup> /Å <sup>3</sup> ) |                 |
| DLPC   | Water    | 10.2             | 0.295                                       | 8.6              | 0.433                                       | --               | --                                          | 3.37            |
| DLPC   | Anionic  | 10.2             | 0.295                                       | 7.9              | 0.441                                       | 150.5            | 0.336                                       | 3.39            |
| DLPC   | Cationic | 9.7              | 0.289                                       | 8.9              | 0.428                                       | 236.6            | 0.335                                       | 3.28            |
| POPG   | Water    | 16.9             | 0.314                                       | 6.3              | 0.507                                       | --               | --                                          | 3.78            |
| POPG   | Anionic  | 17.0             | 0.329                                       | 5.4              | 0.512                                       | 153.4            | 0.335                                       | 3.95            |
| POPG   | Cationic | 15.5             | 0.310                                       | 9.2              | 0.531                                       | 199.8            | 0.345                                       | 3.57            |

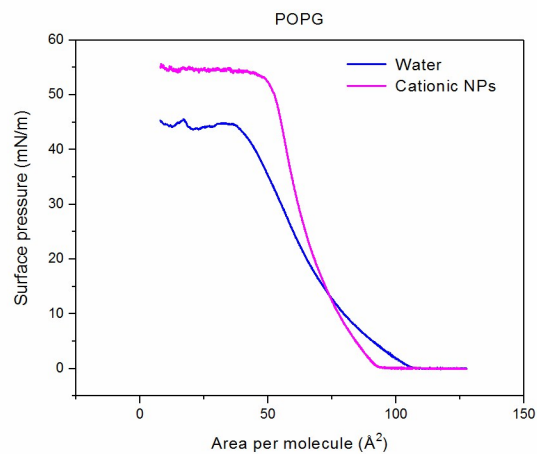

**Figure S1.** Surface pressure-area isotherms of POPG on subphases of water and 0.001 wt% cationic NPs at  $22.0 \pm 0.5$  °C.

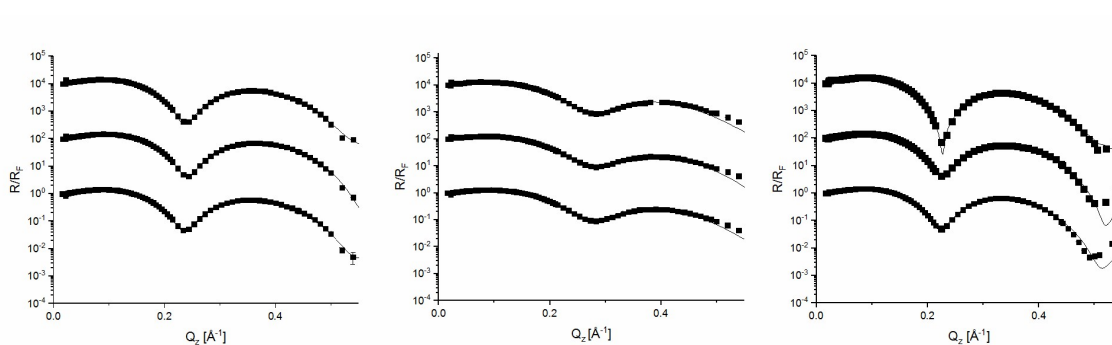

**Figure S2.** XR data for DPPC (left), DPPC:DLPC 7:3 (middle), and DPPC:POPG 7:3 (right) on subphases of water (bottom), 0.001 wt% anionic silica NPs (middle), and 0.001 wt% cationic silica NPs (top) at 35 mN/m and  $22.0 \pm 0.5$  °C. Experimental data is shown as dots and the fits are shown as lines. For clarity the reflectivity curves have been shifted along the ordinate.

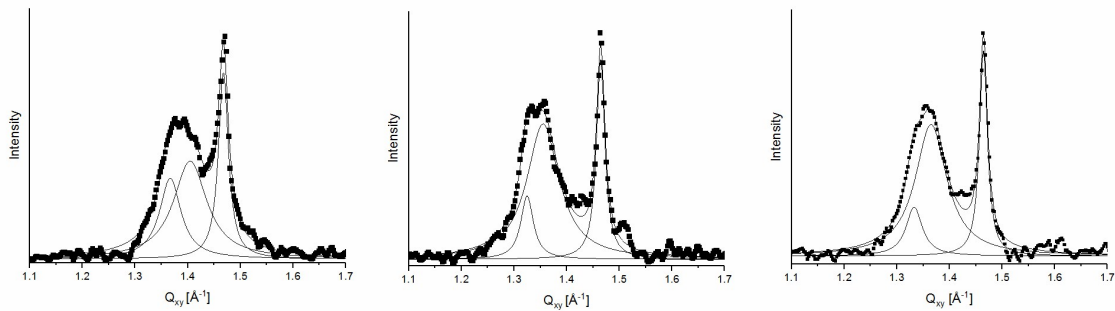

**Figure S3.** Bragg peaks from GIXD data analysis for DPPC on subphases of water (left), 0.001 wt% anionic silica NPs (middle), and 0.001 wt% cationic silica NPs (right) at 35 mN/m and  $22.0 \pm 0.5$  °C. Experimental data is shown as dots and the fits are shown as lines.
